# Supplementary material for: Genetic Variation in CNS Myelination and Functional Brain Connectivity in Recombinant Inbred Mice
Source: MDPI journal article supplement (doi:10.3390/cells9092119), 2020-09-18

Supplemental  
Western blot data

CNP

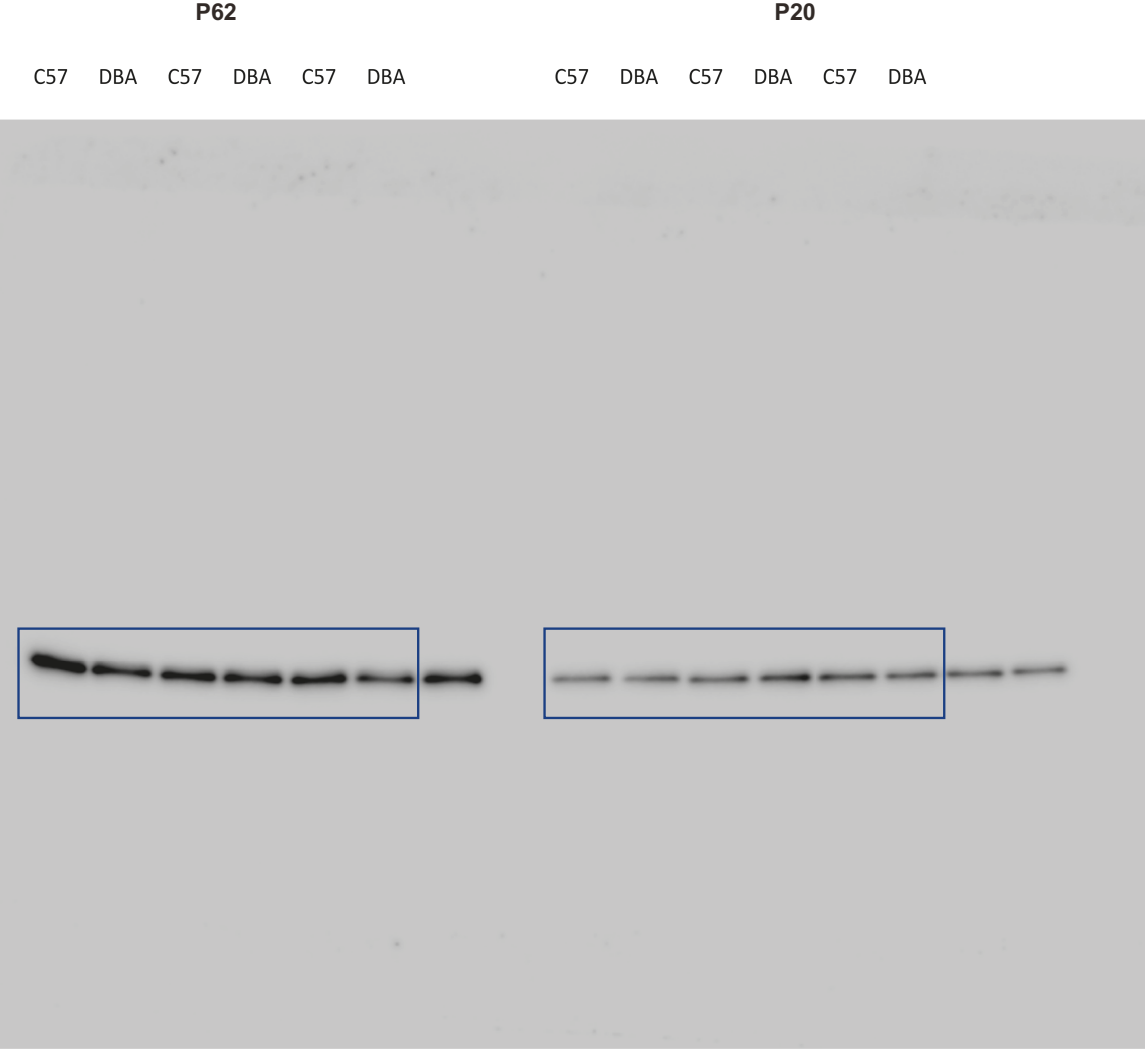

Supplemental  
Western blot data

# MOBP

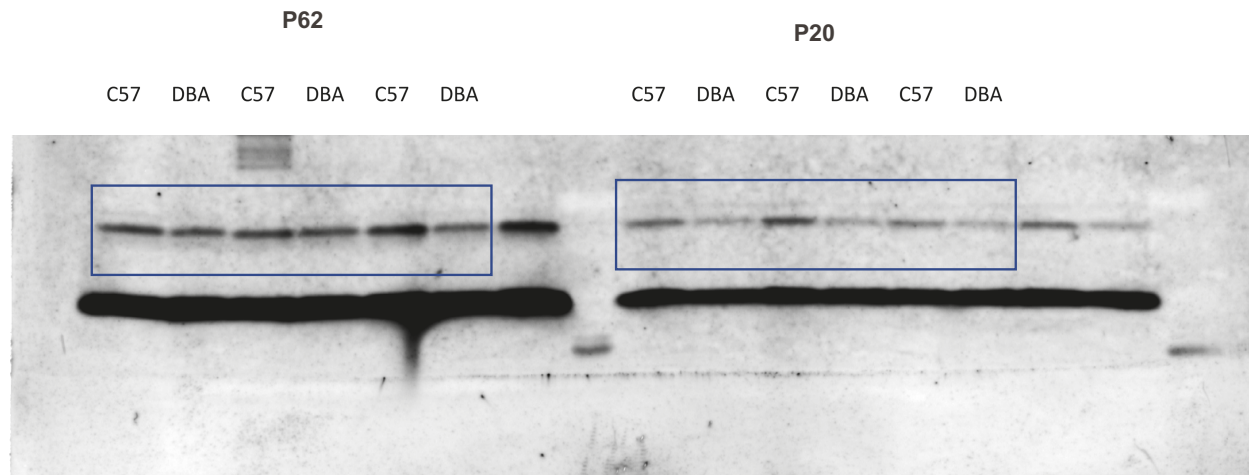

Supplemental  
Western blot data

MAG

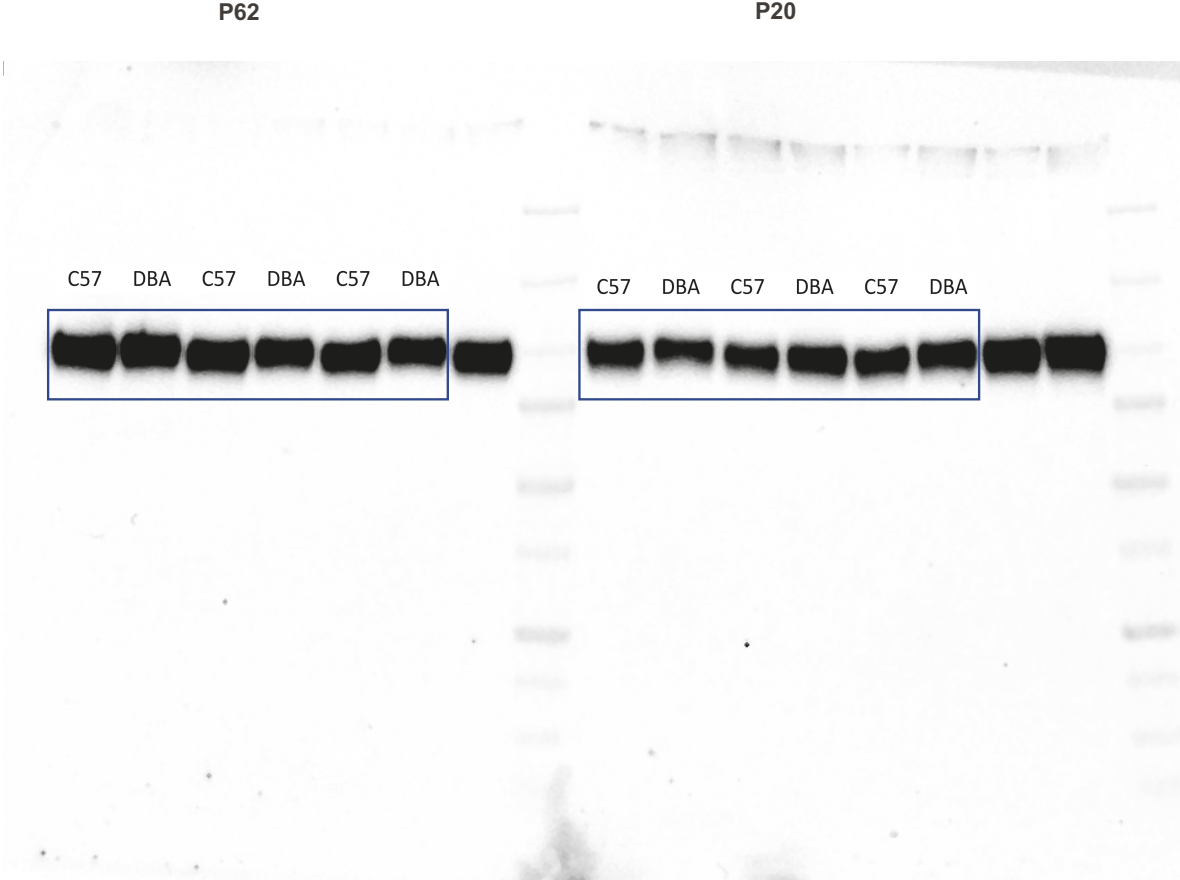

Supplemental  
Western blot data

MOG

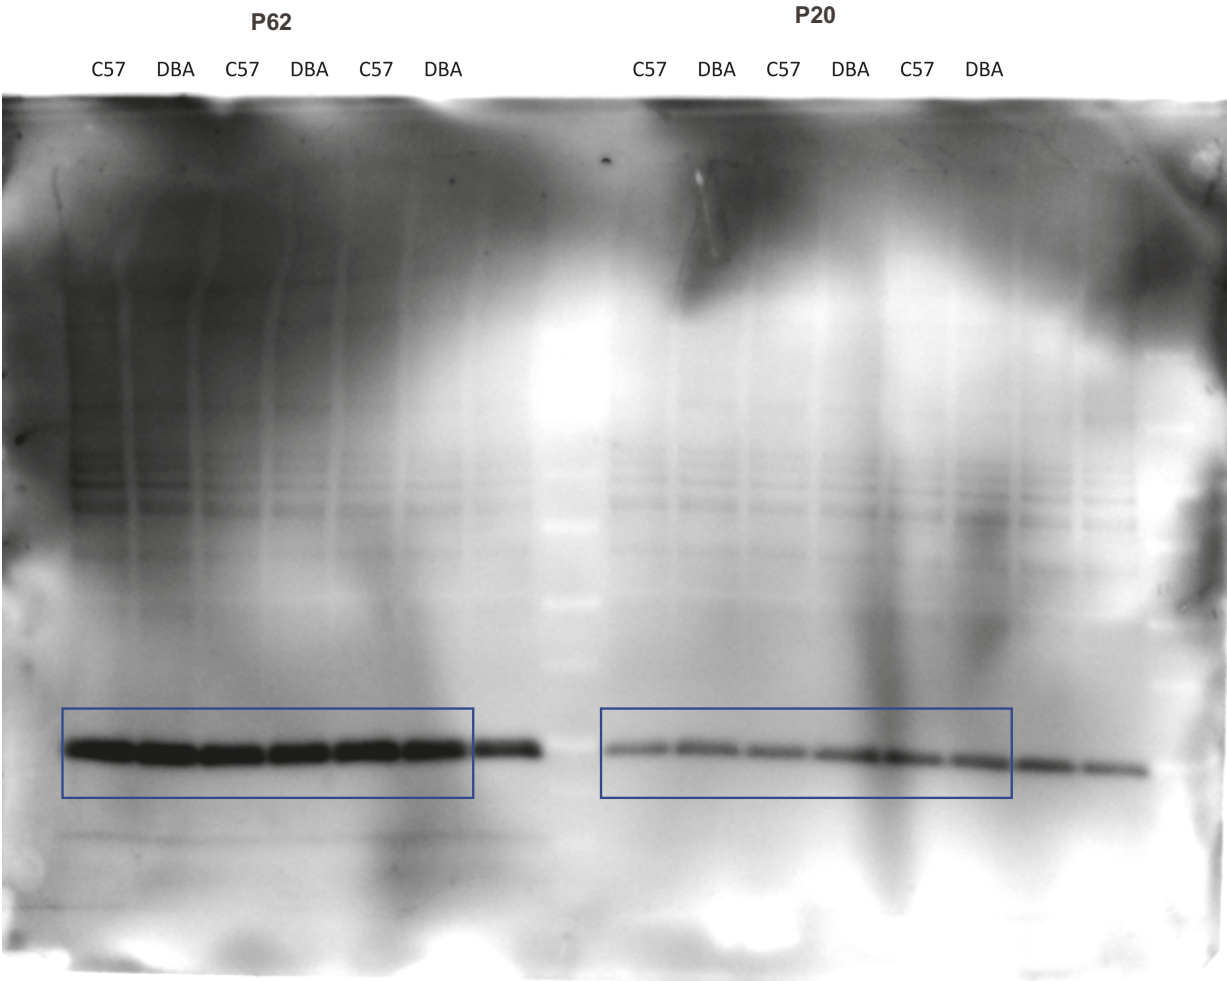

Supplemental  
Western blot data

MBP

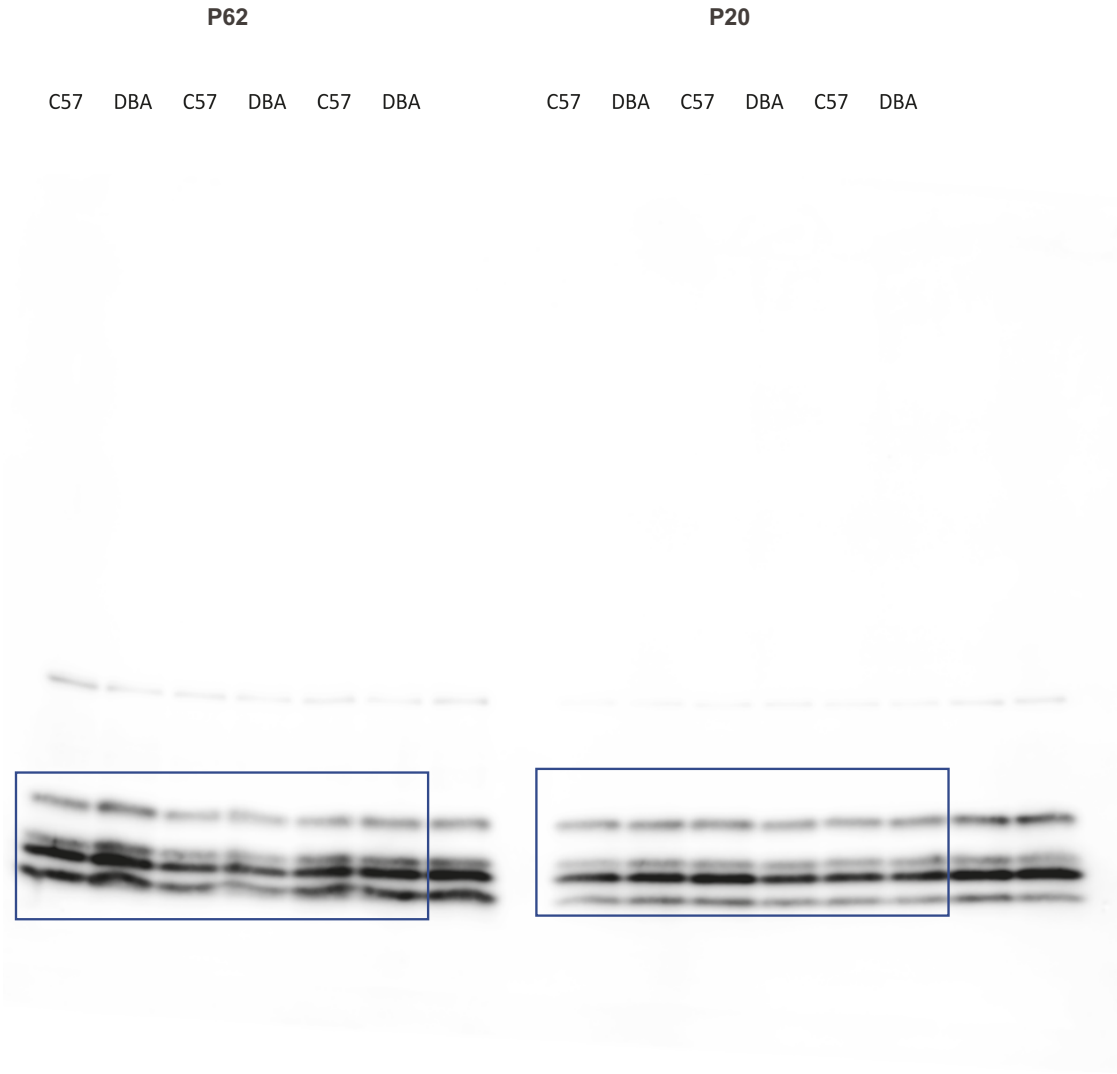

Supplemental  
Western blot data

TUB3

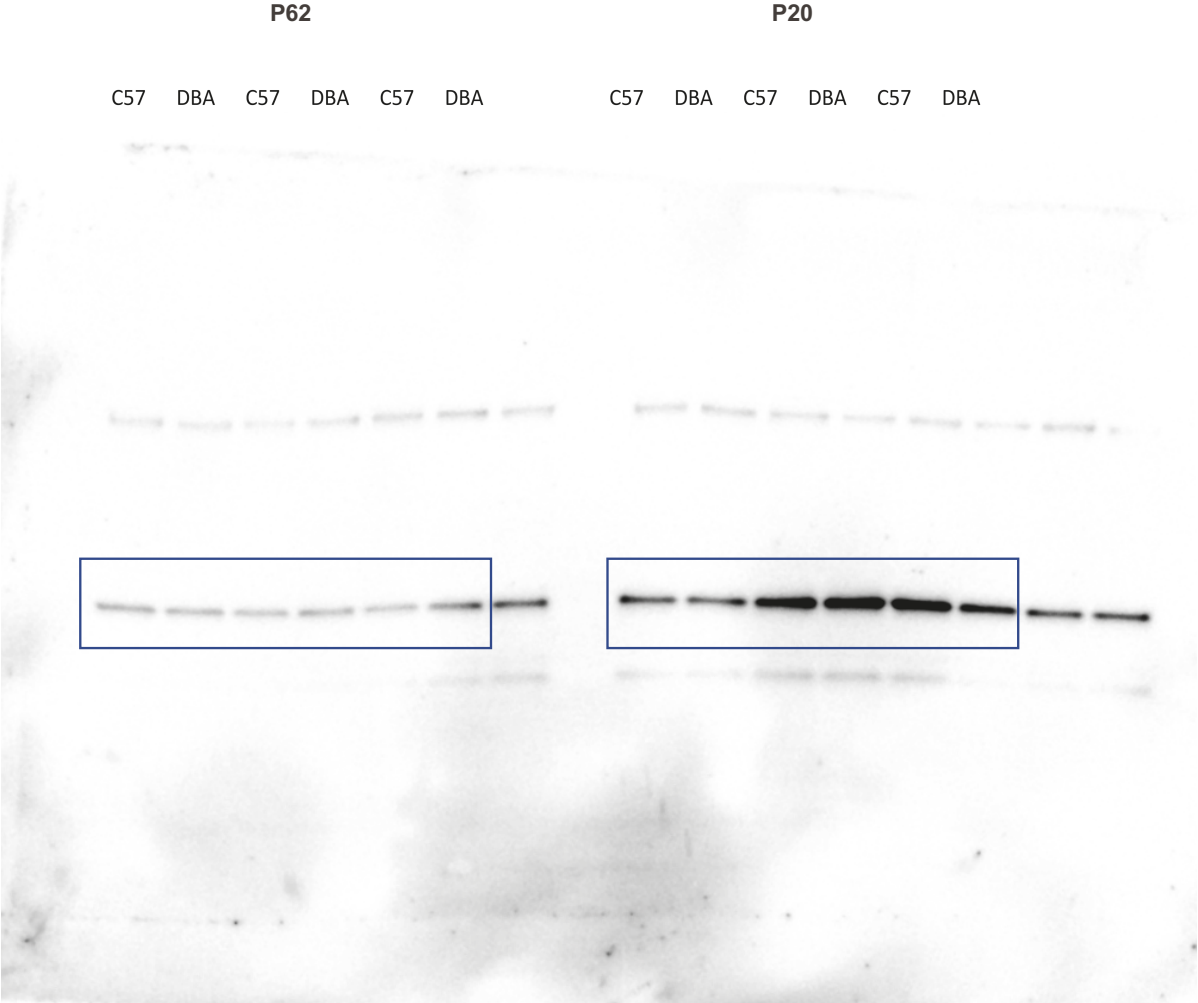

Supplemental  
Western blot data

# GAP43

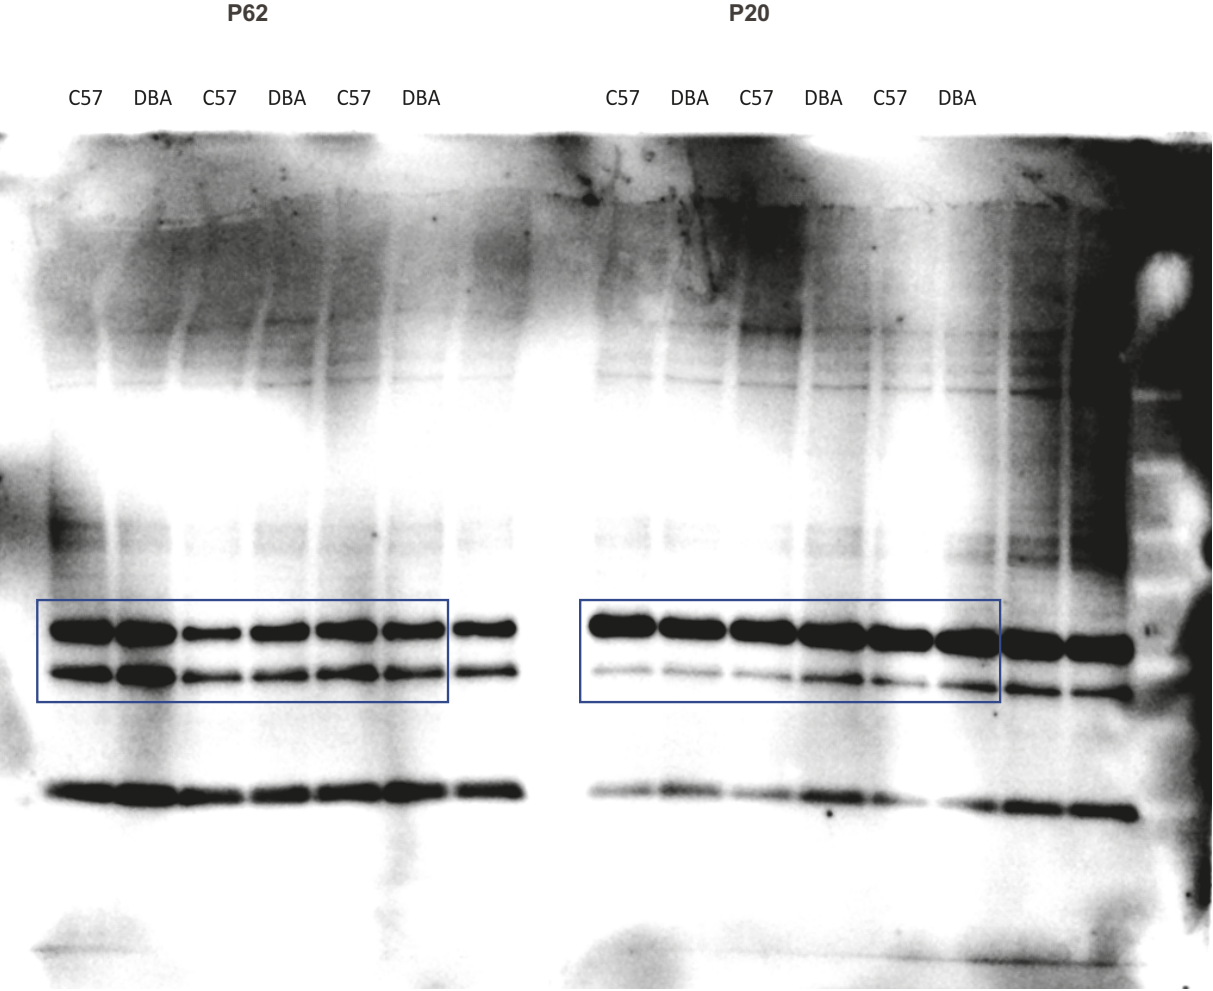

Supplemental  
Western blot data

PSD95

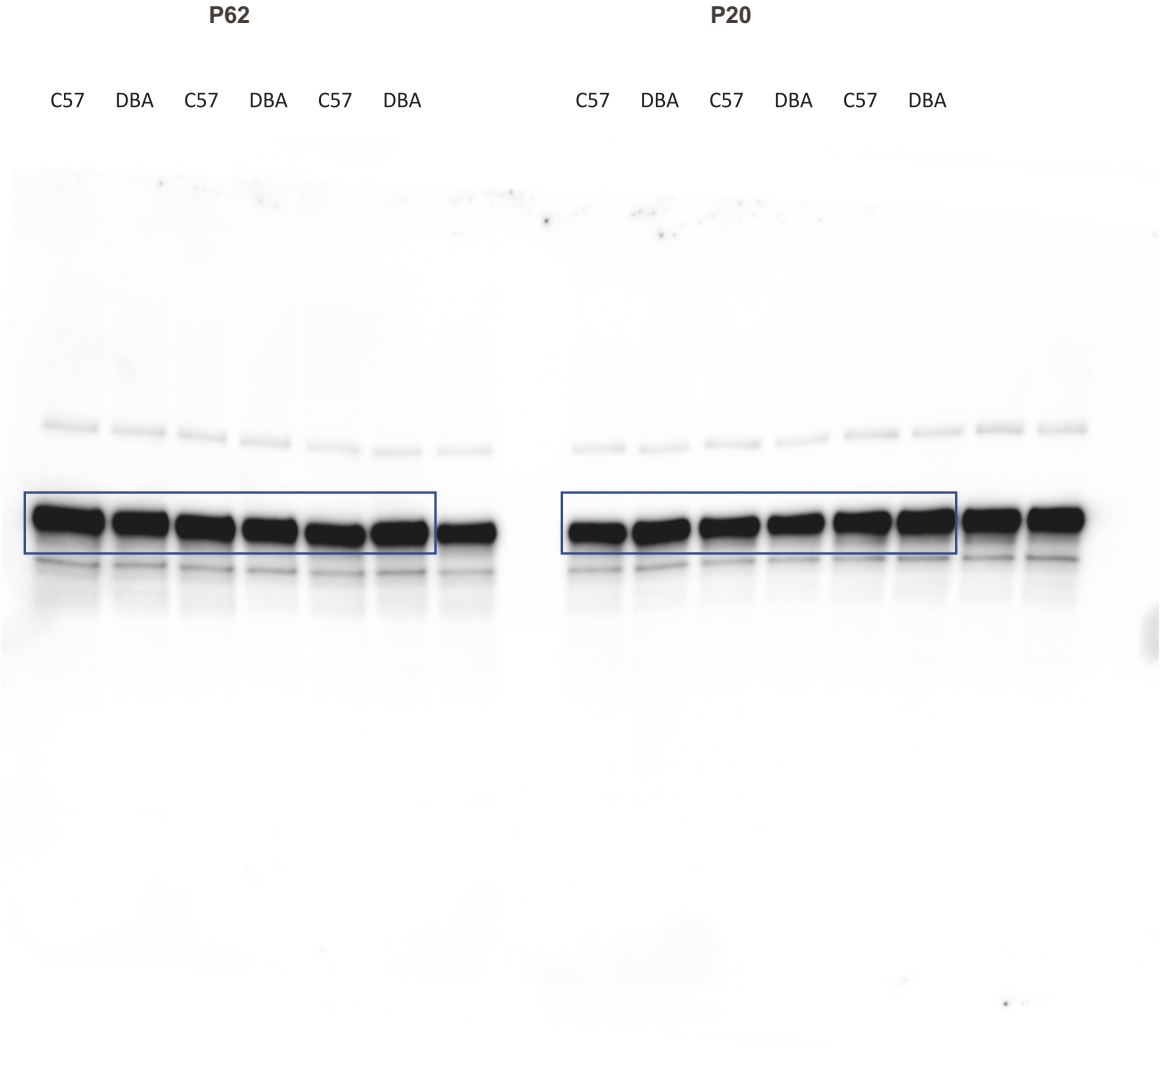

Supplement: s1 [file s1]
