# Supplementary material for: Genetic Variation in CNS Myelination and Functional Brain Connectivity in Recombinant Inbred Mice
Source: MDPI journal article supplement (doi:10.3390/cells9092119), 2020-09-18
Supplement: s1 [file s1]

Figure S1: No differences in neuronal/axonal protein expression between C57 and DBA mice in whole brain extracts

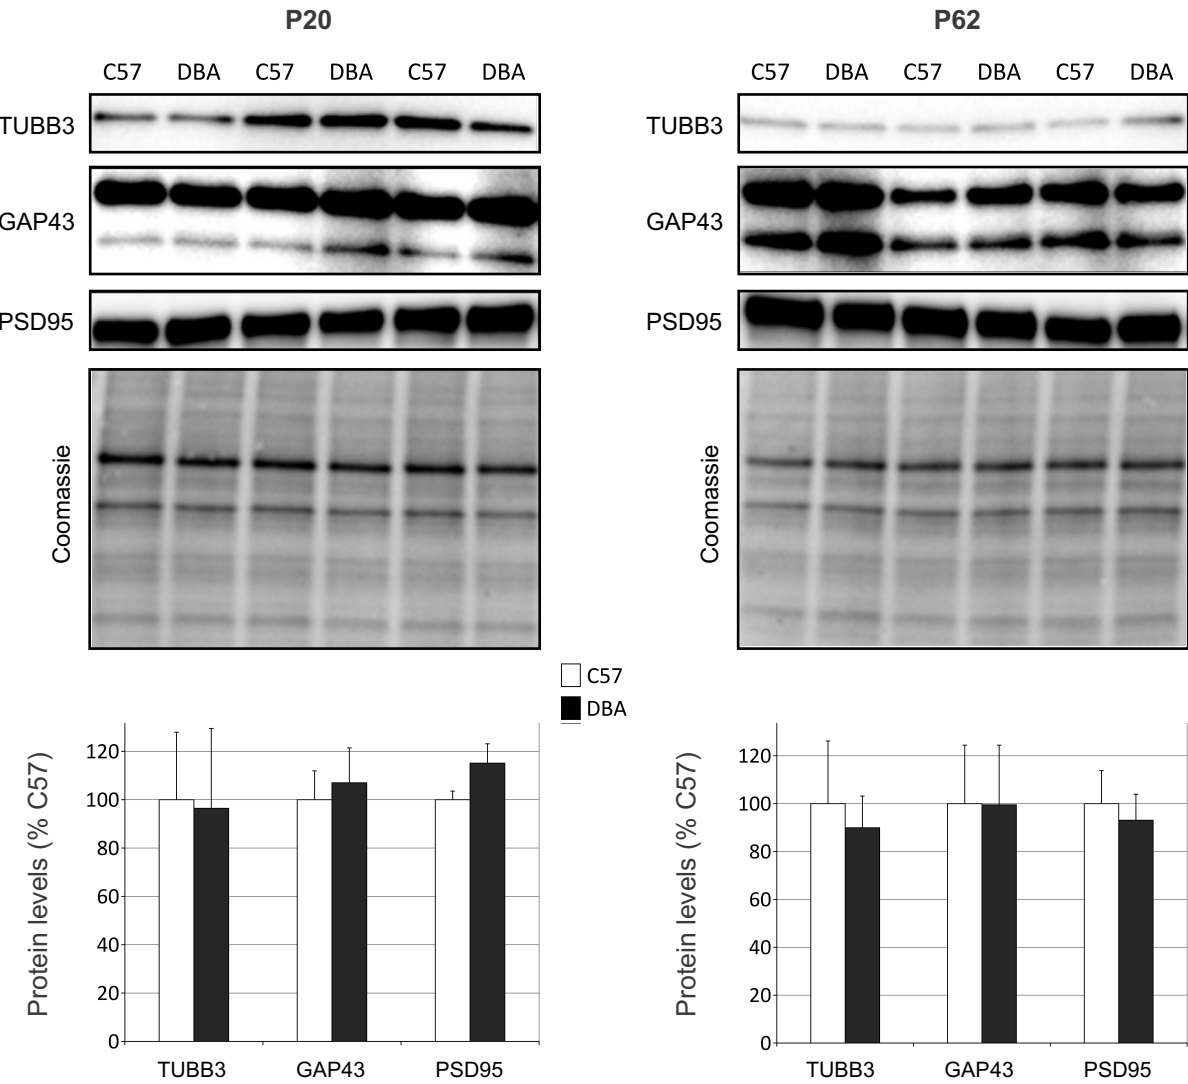

Figure S2: Example trace of slow and fast wave conduction velocity in corpus callosum.

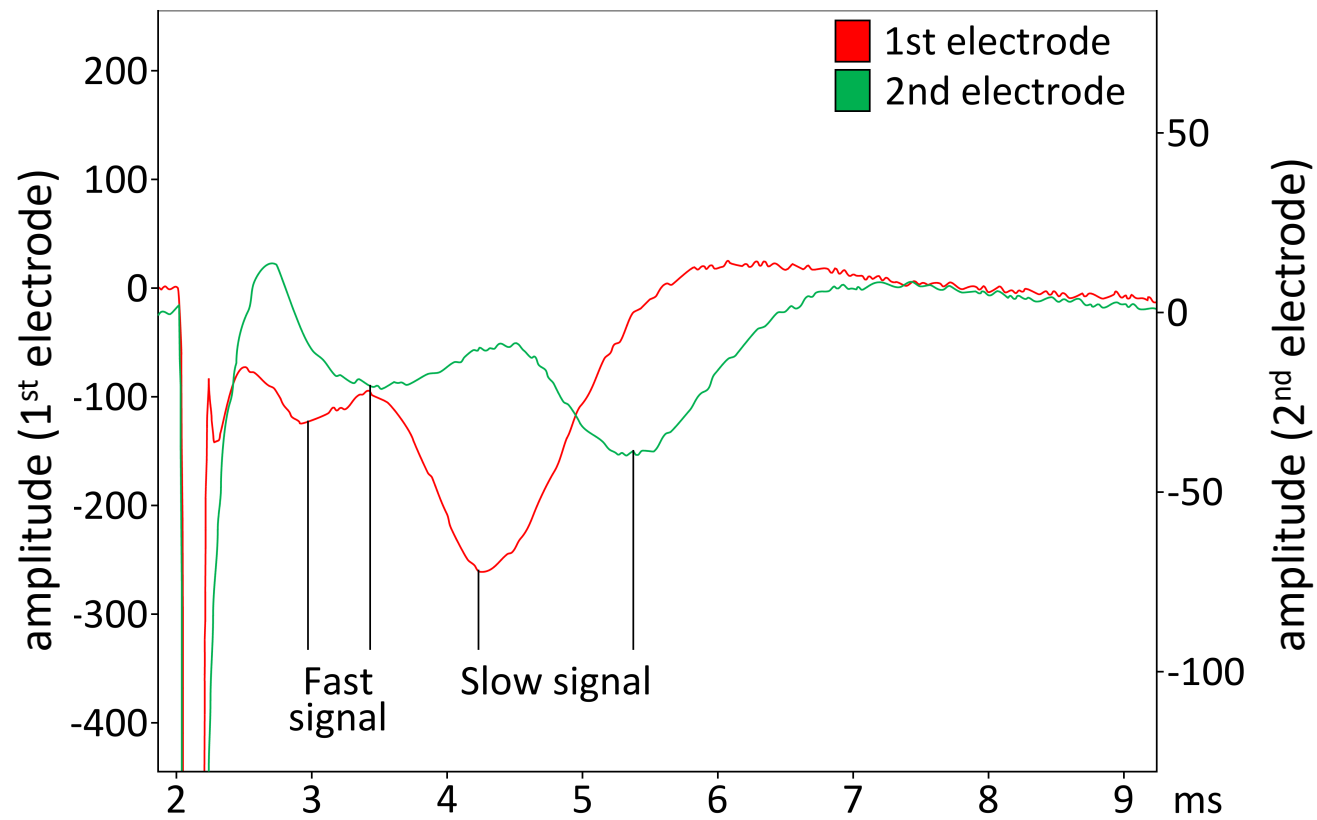

## Supplemental Table S1

**Table S1. Sequences of primers used for PCR analysis**

| <b>Genes</b>              | <b>Primer sequence forward</b> | <b>Primer sequence reverse</b> |
|---------------------------|--------------------------------|--------------------------------|
| PLP1                      | CCCACCCCTATCCGCTAGTT           | CAGGAAAAAAGCACCATTGTG          |
| MBP                       | CACACACGAGAACTACCCA            | GGTGTTGAGGTGTCACAA             |
| MOBP                      | AACTCCAAGCGTGAGATCGT           | CAGAGGCTGTCCATTACAA            |
| MAG                       | GATGATATTCCTCGCCACC            | ACTGACCTCCACTTCCGTT            |
| CNP1                      | AGGAGAAGCTTGAGCTGGTC           | CGATCTCTTCACCACCTCCT           |
| Claudin11                 | CACCATCCCCACCTGCCGAAAA         | CAAGCCTGCACGTAGCCTGGAA         |
| <b>Housekeeping genes</b> | <b>Primer sequence forward</b> | <b>Primer sequence reverse</b> |
| GAPDH                     | CAGCAATGCATCCTGCACC            | TGGACTGTGGTCATGAGCCC           |
| GDI                       | TTGCCAGCACCACTGTAGAGA          | TCTGGTCAATGGGTCCAACA           |
| rEF1a                     | ACCCTCCACTTGGTCGTTTTG          | AGCTCCTGCAGCCTTCTTGTC          |
| Ghprt                     | ATGGGAGGCCATCACATTGT           | ATGTAATCCAGCAGGTCAGCAA         |
| VCP                       | TGGCCGTCTAGATCAGTCAT           | TTTCGCAGATTGGCTTTTAGG          |
